# Supplementary material
Source: Springer Nature journal article supplement (https://www.springermedizin.de/resource/supplementary/12961_2013_284_MOESM2_ESM.pdf/9570954)

# Mtengo, Deliveries

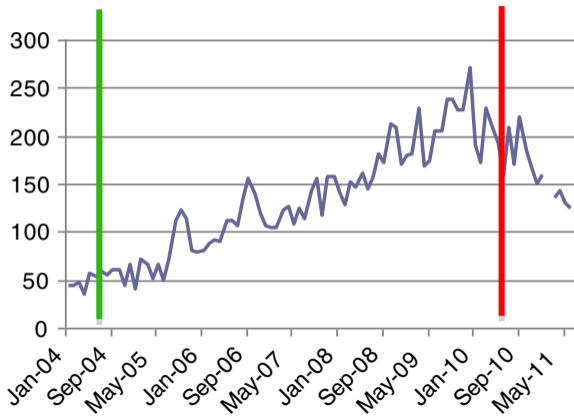

Supplement: MOESM2 [file 9570954]
